# Supplementary material for: Improving soil aquifer treatment efficiency using air injection into the subsurface
Source: Copernicus journal article supplement (doi:10.5194/hess-27-2509-2023), 2023-07-10
Supplement: Supplementary file 1 [file hess-27-2509-2023-supplement.pdf]

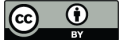

*Supplement of*

## **Improving soil aquifer treatment efficiency using air injection into the subsurface**

**Ido Arad et al.**

*Correspondence to:* Ido Arad (idoarad1@gmail.com)

The copyright of individual parts of the supplement might differ from the article licence.

## S1 Conversion from actual to standard volumetric flow rate

$$(S1) Q_{std} = Q_{actual} \frac{P_{actual} T_{std}}{P_{std} T_{actual}}$$

Where  $Q_{std}$  is the standard volumetric flow rate in standard liters per minute (SLPM),  $Q_{actual}$  is the measured volumetric flow rate in liters per minute (LPM),  $P_{actual}$  is the measured pressure (bar), and  $T_{actual}$  is the measured temperature (K).  $P_{std}$  and  $T_{std}$  were taken as 1 bar and 273.15 K - the standard pressure and temperature defined by the international union of pure and applied chemistry (IUPAC; (Ewing et al., 1994).

## S2 Contaminants of emerging concern (CECs) analysis

LC separation of Ibuprofen (IBP) was conducted by using a mixture of methanol (MeOH) and 1% (V/V) formic acid (FA) solution as a mobile phase. The gradient program was as follows: constant 50% MeOH and 50% FA solution during 0.5 min, then changes of 50–100% MeOH, 50–0% FA solution were taken in 0.5-8 min. 100% content of MeOH was kept until 10 min and then restored to 50% at 11 min. Constant 50% MeOH and 50% FA solution was kept for 4 min (11-15 min.). Electrospray mass data were acquired in the negative mode with a spray voltage of -4.2 kV. The source temperature was 500°C. N<sub>2</sub> was used as the curtain gas (setting 35), IonSource gas 1 (GS1 gas setting 60) and IonSource gas 2 (GS2 gas setting 40). MS/MS was performed using N<sub>2</sub> as collision gas (CAD gas setting 3). Other specific operating conditions are shown in Table S1.

**Table S1.** Optimized LC-MS/MS parameters for IBP

|                                       | IBP <sup>a</sup> | IBP <sup>b</sup> |
|---------------------------------------|------------------|------------------|
| [M-1]/Fragment Ion (m/z)              | 205.1/159.1      | 205.1/161.1      |
| Delustering potential DP (V)          | -18              | -18              |
| Entrance potential EP (V)             | -10              | -10              |
| Collision energy (rel. units)         | -15              | -15              |
| Collision cell exit potential CXP (V) | -4               | -4               |
| Retention time (RT)                   | 10.96            | 10.96            |

<sup>a</sup> for quantitation. <sup>b</sup> for qualitative identification.

LC separation of Carbamazepine (CBZ) and Benzotriazole (BTR) was also conducted by using a mixture of methanol (MeOH) and 1% (V/V) formic acid (FA) solution as a mobile phase. The gradient program was as follows: constant 5% MeOH and 95% FA solution for 2 min, then changes of 5–100% MeOH, 95–0% FA solution were taken in 2–7 min. 100% content of MeOH was kept until 11 min and then restored to 5% at 13 min. Constant 5% MeOH and 95% FA solution was kept for 6 min

25 (13-19 min). Electrospray mass data were acquired in the positive mode with a spray voltage of 5.5 kV. The source temperature was 550°C. N<sub>2</sub> was used as the curtain gas (setting 30), IonSource gas 1 (GS1 gas setting 50) and IonSource gas 2 (GS2 gas setting 60). MS/MS was performed using N<sub>2</sub> as collision gas (CAD gas setting 10). Other specific operating conditions are shown in Table S2.

**Table S2.** Optimized LC-MS/MS parameters for CBZ and BTR

|                                       | CBZ <sup>a</sup> | CBZ <sup>a</sup> | BTR <sup>a</sup> | BTR <sup>b</sup> |
|---------------------------------------|------------------|------------------|------------------|------------------|
| [M+1]/Fragment Ion (m/z)              | 237.1/194.1      | 237.1/193.1      | 120.1/65.2       | 120.1/92.0       |
| Delustering potential DP (V)          | 40               | 40               | 42               | 42               |
| Entrance potential EP (V)             | 10.5             | 10.5             | 10.5             | 10.5             |
| Collision energy (rel. units)         | 25               | 25               | 32               | 23               |
| Collision cell exit potential CXP (V) | 4                | 4                | 2.5              | 5.0              |
| Retention time (RT)                   | 10.5             | 10.5             | 9.24             | 9.24             |

<sup>a</sup> for quantitation. <sup>b</sup> for qualitative identification.

30

35

40

45

### S3 Synthetic effluent composition

**Table S3.** Basic parameters of the synthetic effluent – mean  $\pm$  SD

| Experiment         | [NH <sub>4</sub> <sup>+</sup> ] (mg-N L <sup>-1</sup> ) | [TKN] (mg L <sup>-1</sup> ) | [NO <sub>3</sub> <sup>-</sup> ] (mg-N L <sup>-1</sup> ) | [TN] (mg L <sup>-1</sup> ) | [DOC] (mg L <sup>-1</sup> ) |
|--------------------|---------------------------------------------------------|-----------------------------|---------------------------------------------------------|----------------------------|-----------------------------|
| FDO                | 2.46 $\pm$ 0.95                                         | 8.94 $\pm$ 0.66             | 1.53 $\pm$ 0.37                                         | 10.48 $\pm$ 0.88           | 41.61 $\pm$ 1.38            |
| AI-LF <sub>1</sub> | 1.83 $\pm$ 0.43                                         | 9.03 $\pm$ 0.21             | 0.12 $\pm$ 0.01                                         | 9.16 $\pm$ 0.21            | 41.50 $\pm$ 0.99            |
| AI-HF <sub>1</sub> | 3.61 $\pm$ 0.49                                         | 8.20 $\pm$ 0.07             | 0.66 $\pm$ 0.09                                         | 8.88 $\pm$ 0.11            | 40.37 $\pm$ 1.49            |
| AI-HF <sub>2</sub> | 4.19 $\pm$ 0.29                                         | 8.42 $\pm$ 0.30             | 0.96 $\pm$ 0.41                                         | 9.39 $\pm$ 0.17            | 39.82 $\pm$ 0.69            |
| AI-HF <sub>3</sub> | 2.96 $\pm$ 0.44                                         | 7.66 $\pm$ 0.79             | 0.71 $\pm$ 0.04                                         | 8.37 $\pm$ 0.78            | 40.66 $\pm$ 3.35            |
| AI-LF <sub>2</sub> | 3.68 $\pm$ 0.51                                         | 8.30 $\pm$ 0.20             | 0.81 $\pm$ 0.14                                         | 9.12 $\pm$ 0.10            | 42.56 $\pm$ 1.59            |

50

**Table S4.** Concentrations of emerging contaminants in the synthetic effluent – mean  $\pm$  SD

| Experiment         | [IBP] ( $\mu$ g L <sup>-1</sup> ) | [CBZ] ( $\mu$ g L <sup>-1</sup> ) | [BTR] ( $\mu$ g L <sup>-1</sup> ) |
|--------------------|-----------------------------------|-----------------------------------|-----------------------------------|
| FDO <sup>a</sup>   | 0.76 $\pm$ 0.03                   | 1.66 $\pm$ 0.04                   | 7.37 $\pm$ 2.24                   |
| AI-LF <sub>1</sub> | 1.45 $\pm$ 0.08                   | 1.05 $\pm$ 0.05                   | 9.48 $\pm$ 0.47                   |
| AI-HF <sub>1</sub> | 1.06 $\pm$ 0.14                   | 0.91 $\pm$ 0.07                   | 9.05 $\pm$ 0.43                   |
| AI-HF <sub>2</sub> | 0.80 $\pm$ 0.09                   | 1.08 $\pm$ 0.04                   | 8.90 $\pm$ 0.44                   |
| AI-HF <sub>3</sub> | 71.57 $\pm$ 6.97                  | 1.24 $\pm$ 0.02                   | 8.43 $\pm$ 0.25                   |
| AI-LF <sub>2</sub> | 65.00 $\pm$ 3.78                  | 2.25 $\pm$ 0.08                   | 4.83 $\pm$ 0.30                   |

<sup>a</sup> In FDO, samples were taken and analyzed for only one replicate

55 S4 Volumetric water content (VWC) at various depths during the three main experiments

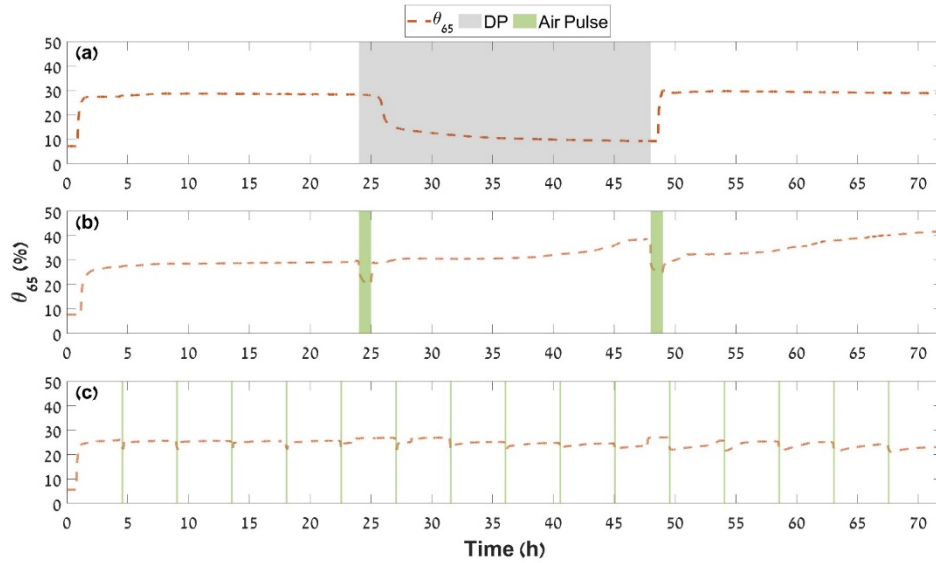

**Fig. S1.** VWC at a depth of 65 cm below soil surface ( $\theta_{65}$ ) during FDO, AI-LF<sub>1</sub> and AI-HF<sub>1</sub> (panels **a**, **b** and **c**, respectively). Gray areas symbolize DP, while green areas symbolize the air pulses.

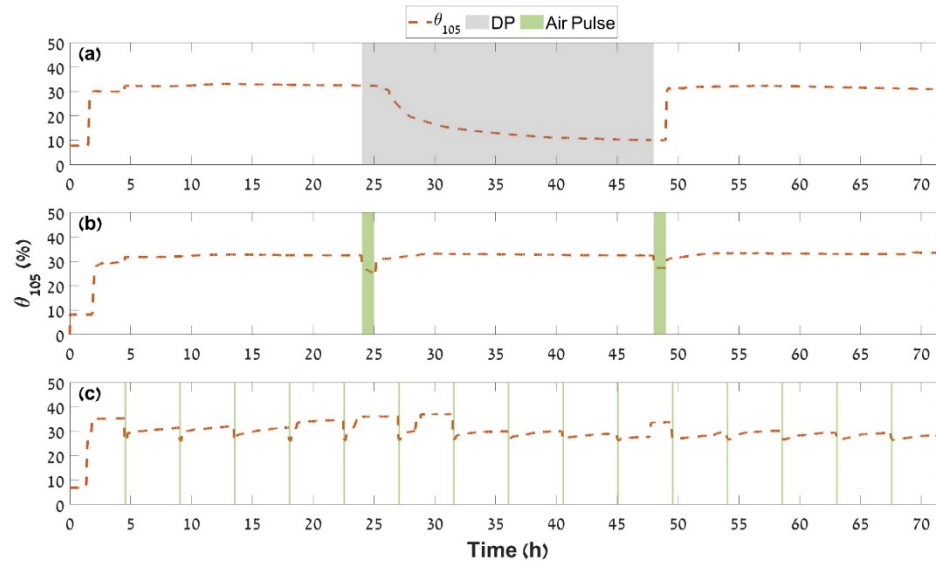

**Fig. S2.** VWC at a depth of 105 cm below soil surface ( $\theta_{105}$ ) during FDO, AI-LF<sub>1</sub> and AI-HF<sub>1</sub> (panels **a**, **b** and **c**, respectively). Gray areas symbolize DP, while green areas symbolize the air pulses.

60

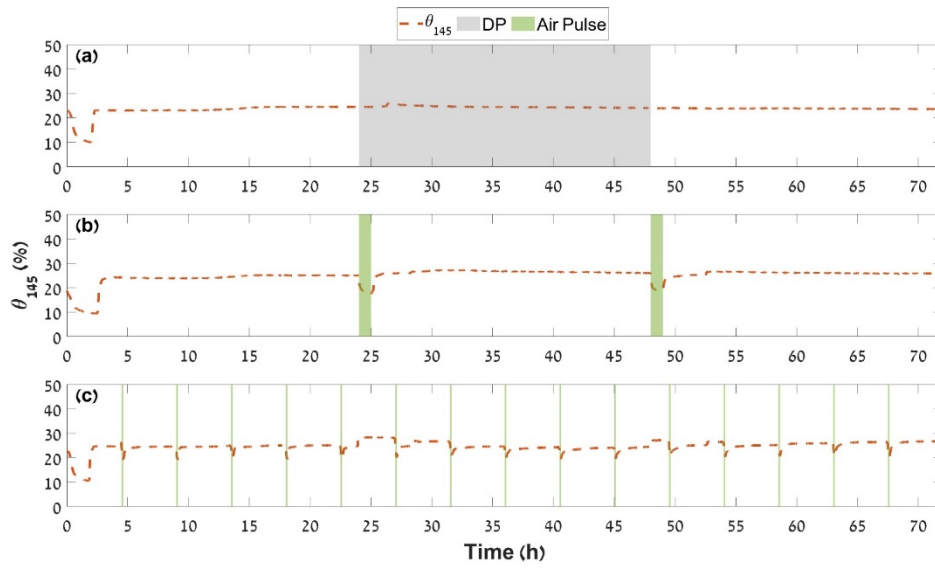

65

**Fig. S3.** VWC at a depth of 145 cm below soil surface ( $\theta_{145}$ ) during FDO, AI-LF<sub>1</sub> and AI-HF<sub>1</sub> (panels **a**, **b** and **c**, respectively). Gray areas symbolize DP, while green areas symbolize the air pulses.

70

### S5 Infiltrated volumes and mean infiltration rates

**Table S5.** Infiltrated volumes and mean infiltration rates throughout each experiment

| Time (h)           | 0-24                                                                    | 24-48         | 48-72       |
|--------------------|-------------------------------------------------------------------------|---------------|-------------|
| Experiment         | Infiltrated volume in L (mean infiltration rate in cm h <sup>-1</sup> ) |               |             |
| FDO (1)            | 95 (20.30)                                                              | 0 (0)         | 91 (19.44)  |
| FDO (2)            | 151 (32.26)                                                             | 0 (0)         | 81 (17.31)  |
| AI-LF <sub>1</sub> | 96 (20.51)                                                              | 132 (28.20)   | 129 (27.56) |
| AI-HF <sub>1</sub> | 111 (23.71)                                                             | 97 (20.72)    | 67 (14.31)  |
| AI-HF <sub>2</sub> | 92 (19.66)                                                              | 89 (19.01)    | 69 (14.53)  |
| AI-HF <sub>3</sub> | 103 (22.01)                                                             | 71.5 (15.28)  | 54 (11.54)  |
| AI-LF <sub>2</sub> | 120 (25.64)                                                             | 112.5 (24.03) | 103 (22.01) |

## S6 Oxidation-reduction potential (ORP) at various depths during the three main experiments

75

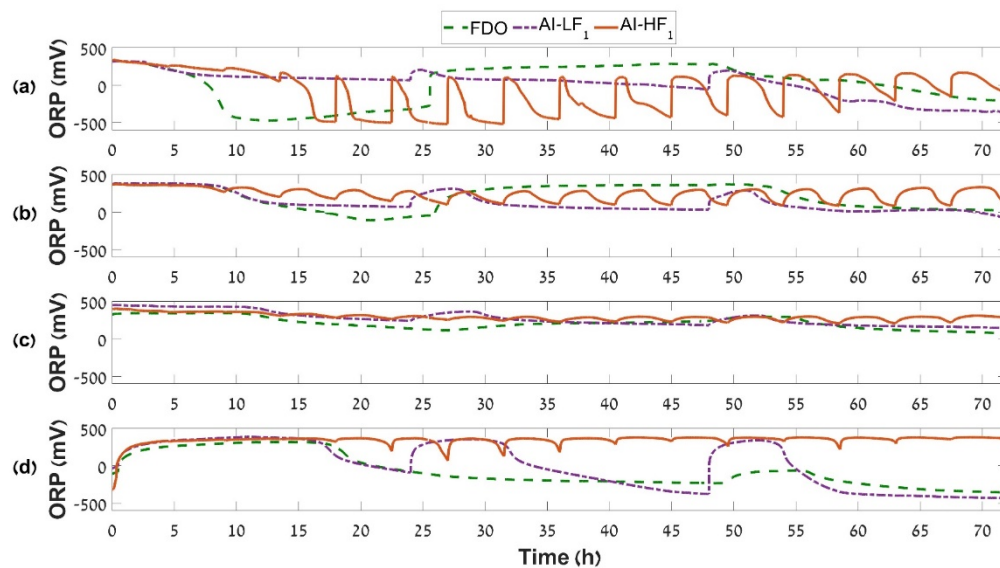

**Fig. S4.** ORP vs. Ag/AgCl at depths of 25, 65, 105 and 145 cm below soil surface (panels **a**, **b**, **c**, and **d**, respectively) during FDO, AI-LF<sub>1</sub> and AI-HF<sub>1</sub>.

## S7 Surface head (SH) during the three main experiments

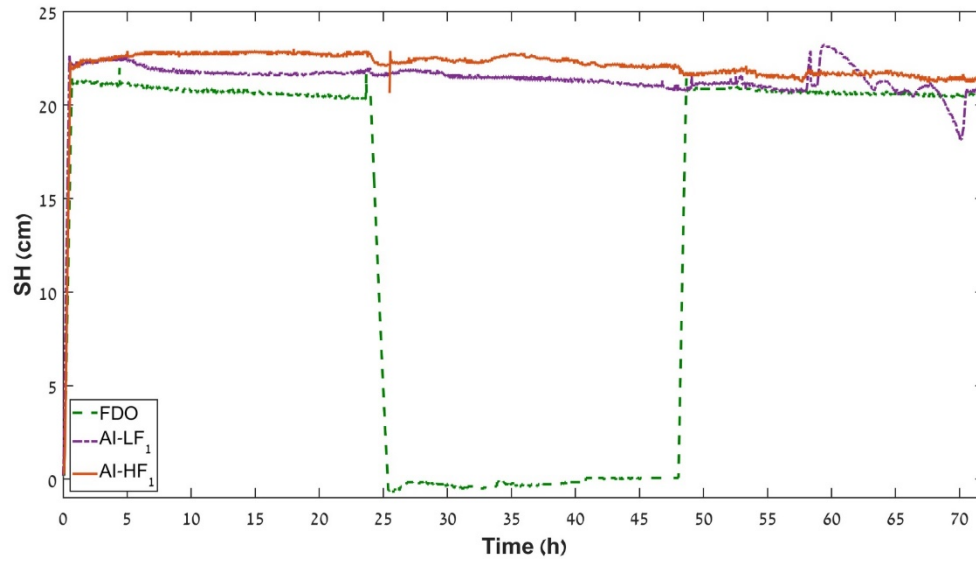

Fig. S5. Surface head (SH) during FDO, AI-LF<sub>1</sub> and AI-HF<sub>1</sub>.



## S8 Dissolved oxygen (DO) during the three main experiments

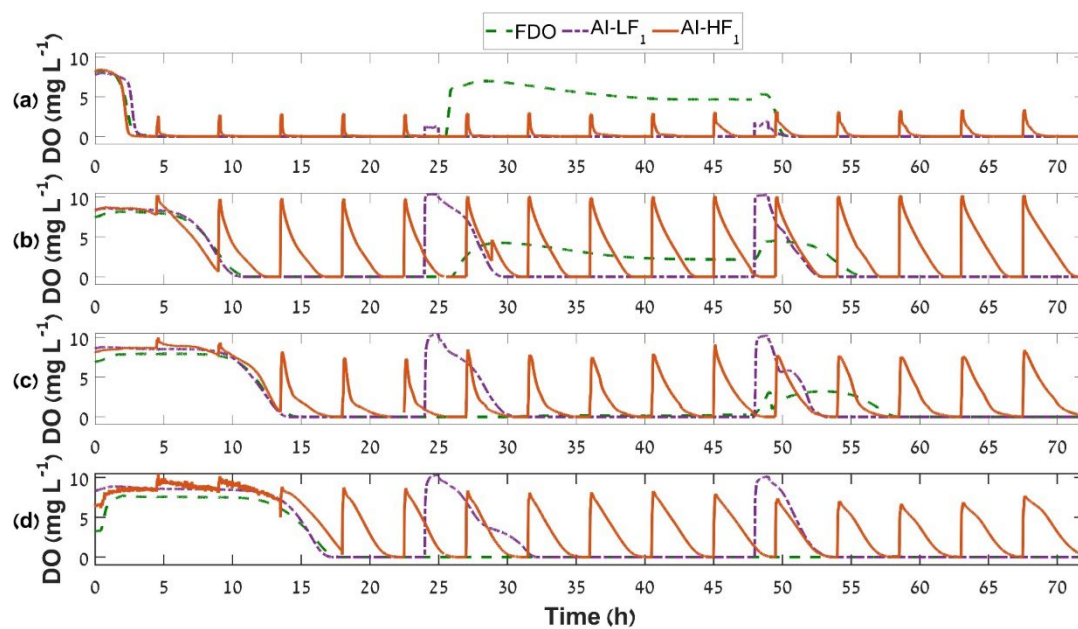

**Fig. S6.** DO at depths of 25, 65, 105 and 145 cm below soil surface (panels **a**, **b**, **c**, and **d**, respectively) during FDO, AI-LF<sub>1</sub> and AI-HF<sub>1</sub>.

## S9 Effluent quality

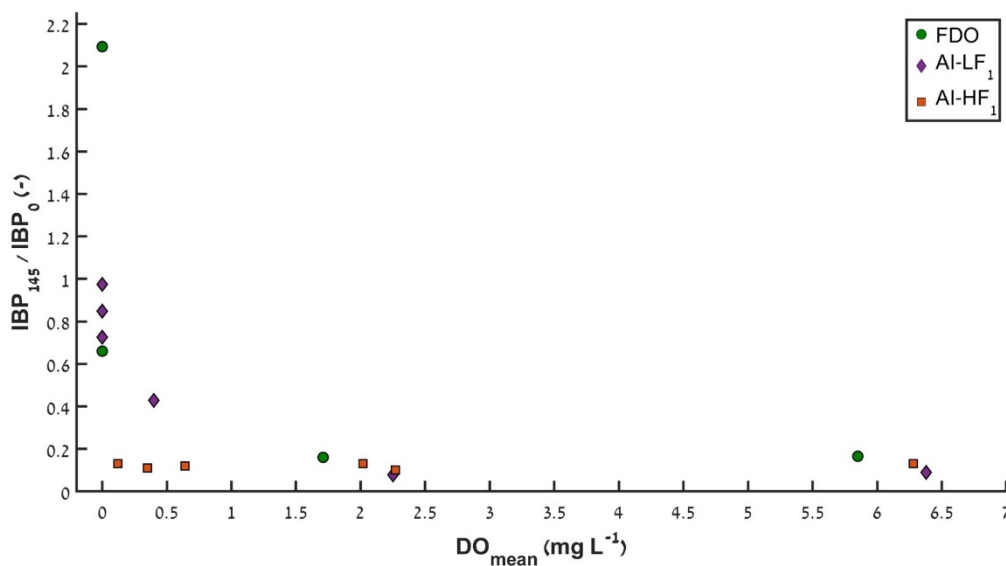

**Fig. S7.** IBP concentration at a depth of 145 cm vs. the mean DO throughout the column, during FDO, AI-LF<sub>1</sub> and AI-HF<sub>1</sub>. The concentration is normalized to the inlet concentration. Values below detection limit (DL) were regarded with DL/2. In FDO, samples were taken and analyzed for only one replicate

85

**Table S6.** Basic parameters of the effluent at a depth of 145 cm, normalized to the inlet concentration – mean ± SD

| Experiment         | [TKN] (-)   | [NO <sub>3</sub> <sup>-</sup> ] (-) | [TN] (-)    | [DOC] (-)                 |
|--------------------|-------------|-------------------------------------|-------------|---------------------------|
| FDO                | 0.51 ± 0.38 | 0.45 ± 0.74                         | 0.50 ± 0.25 | 0.14 ± 0.08               |
| AI-LF <sub>1</sub> | 0.62 ± 0.30 | 2.13 ± 3.46                         | 0.64 ± 0.28 | 0.23 ± 0.18               |
| AI-HF <sub>1</sub> | 0.11 ± 0.13 | 5.63 ± 1.67                         | 0.58 ± 0.13 | 0.05 ± 0.01               |
| AI-HF <sub>2</sub> | 0.15 ± 0.10 | 3.30 ± 1.92                         | 0.47 ± 0.20 | 0.05 ± 0.05 <sup>90</sup> |
| AI-HF <sub>3</sub> | 0.65 ± 0.29 | 0.57 ± 1.29                         | 0.64 ± 0.18 | 0.16 ± 0.06               |
| AI-LF <sub>2</sub> | 0.72 ± 0.34 | 0.26 ± 0.62                         | 0.68 ± 0.25 | 0.37 ± 0.22               |

<sup>a</sup> Values below the quantitation limit (QL) were regarded with QL/2.

95

100

**Table S7.** Concentrations of CECs in the effluent at a depth of 145 cm, normalized to the inlet concentration – mean<sup>a</sup> ± SD

| Experiment                      | [IBP] (-)   | [CBZ] <sup>b</sup> (-) | [BTR] <sup>b</sup> (-) |
|---------------------------------|-------------|------------------------|------------------------|
| FDO <sup>c</sup>                | 0.77 ± 0.91 | 0.91 ± 0.02            | 0.79 ± 0.33            |
| AI-LF <sub>1</sub>              | 0.52 ± 0.39 | 0.99 ± 0.14            | 0.99 ± 0.07            |
| AI-HF <sub>1</sub>              | 0.12 ± 0.01 | 0.92 ± 0.13            | 0.81 ± 0.05            |
| AI-HF <sub>2</sub>              | 0.16 ± 0.02 | 1.00 ± 0.11            | 0.91 ± 0.09            |
| AI-HF <sub>3</sub> <sup>d</sup> | 0.89 ± 0.02 | -                      | -                      |
| AI-LF <sub>2</sub>              | 0.84 ± 0.27 | 0.97 ± 0.03            | 0.94 ± 0.01            |

<sup>a</sup> Values below the detection limit (DL) were regarded with DL/2.

110

<sup>b</sup> The first sample from each experiment (taken at  $t \sim 4.3$  h) was excluded as an outlier since it showed much lower concentrations than the others, apparently due to retardation of CBZ and BTR as a result of their interactions with soil components.

<sup>c</sup> In FDO, samples were taken and analyzed for only one replicate.

<sup>d</sup> For AI-HF<sub>3</sub>, CBZ and BTR samples were analyzed only at the inflow.

115

## References

Ewing, M. B., Lilley, T. H., Olofsson, G. M., Ratzsch, M. T., and Somsen, G.: Standard quantities in chemical thermodynamics. Fugacities, activities and equilibrium constants for pure and mixed phases (IUPAC Recommendations 1994), *Pure Appl. Chem.*, 66, 533–552, <https://doi.org/10.1351/pac199466030533>, 1994.

120
